# Supplementary material for: Reflexivity in Data Collection: Psychology Students’ Interpretations of Osteoporosis Patient Experiences – A Qualitative Case Study
Source: Research Square preprint supplement (doi:10.21203/rs.3.rs-7560544/v1), 2025-09-29
Supplement: Supplementary file 1 [file 74f22733e44088eb4f857543.docx]

**Table 1.** *Themes and subthemes generated as a result of content analysis*

| 1. Patient profiles |
| --- |
| 2. Patients' evaluations of the disease/treatment process |
| 2.1. Identity |
| 2.2. Perceived duration |
| 2.3. Perceived consequences of the disease |
| 2.4. Perceived cause |
| 2.5. Treatability/controllability |
| 2.6. Emotional and social components |
| 2.7. Hospital and doctor satisfaction |
| 3. Social support needs of patients |
| 3.1. Psychological support |
| 3.2. Informational support |
| 3.3. Emotional support |
| 3.4. Accompaniment support |
| 3.5. Instrumental support |
| 4. Patients' barriers |
| 4.1. Access to treatment |
| 4.2. Environmental |
| 4.3. Economic |
| 4.4. Psychosocial |
| 4.5. Physical |

**Table 2.** *Patient profiles from the student's perspective*

| Patient profile categories |  | N |
| --- | --- | --- |
| Gender | Woman  Male  Total | 16  1  17 |
| Age | Middle-aged  Elderly  Total | 3  10  13 |
| Coming to the hospital with someone | Relatives  Alone  Total | 16  12  28 |
| Personality traits | Kind and moderate  Rough  Sweet  Talkative  Affectionate  Soft-faced  Warm  Helper  Total | 5  1  1  2  1  3  3  2  18 |
